# Supplementary material for: Maternal High Folic Acid Supplement Promotes Glucose Intolerance and Insulin Resistance in Male Mouse Offspring Fed a High-Fat Diet
Source: MDPI journal article supplement (doi:10.3390/ijms15046298), 2014-04-14
Supplement: s1 [file s1]

## Supplementary Information

**Table S1.** The maternal folic acid intakes before and during pregnancy among groups (µg/day).

|        | Ctrl                      | RFolS          | HFolS                         |
|--------|---------------------------|----------------|-------------------------------|
| Number | 20                        | 20             | 20                            |
| Week   |                           |                |                               |
| -2     | 5.78 ± 0.42 <sup>#</sup>  | 14.79 ± 1.26 * | 117.74 ± 10.57 <sup>*,#</sup> |
| -1     | 5.92 ± 0.54 <sup>#</sup>  | 15.01 ± 1.27 * | 121.43 ± 9.05 <sup>*,#</sup>  |
| 1      | 5.96 ± 0.46 <sup>#</sup>  | 15.19 ± 1.41 * | 119.53 ± 11.22 <sup>*,#</sup> |
| 2      | 6.48 ± 0.46 <sup>#</sup>  | 16.13 ± 1.19 * | 129.15 ± 11.98 <sup>*,#</sup> |
| 3      | 10.91 ± 1.03 <sup>#</sup> | 26.68 ± 2.05 * | 208.77 ± 16.74 <sup>*,#</sup> |

Daily folic acid intake (µg/day) = Folic acid contents in diets (µg/g) × daily food intake (g/day). Data are compared by analysis of variance with the *post hoc* Bonferroni method. \*  $p < 0.05$ , compared with Ctrl; <sup>#</sup>  $p < 0.05$ , compared with RFolS. Negative sign represents the weeks before pregnancy. Abbreviations: Ctrl, Control; HFolS, High folic acid supplement; RFolS, recommended folic acid supplement.

**Table S2.** Formulated control and obesogenic diet.

| Ingredient               | Control AIN-93G diet (g) | High fat diet (g) |
|--------------------------|--------------------------|-------------------|
| Cornstarch               | 397.5                    | 287.5             |
| Casein                   | 200.0                    | 200.0             |
| Dextrinized cornstarch   | 132.0                    | 132.0             |
| Sucrose                  | 100.0                    | 100.0             |
| Soybean oil              | 70.0                     | 30.0              |
| Lard <sup>a</sup>        | 0.0                      | 150.0             |
| Fiber                    | 50.0                     | 50.0              |
| Mineral mix (AIN-93G-MX) | 35.0                     | 35.0              |
| Vitamin mix (AIN-93-VX)  | 10.0                     | 10.0              |
| L-Cystine                | 3.0                      | 3.0               |
| Choline bitartrate       | 2.5                      | 0.0               |
| Cholate                  | 0.0                      | 2.5               |

<sup>a</sup> The actual fatty acid composition of lard is 1.4% 14:0, 24.8% 16:0, 2.2% 16:1, 13.2% 18:0, 44.3% 18:1, 13.8% 18:2 and 0.1% 18:3.

**Table S3.** Primer pairs used in present study.

| Gene        | Primer                             |
|-------------|------------------------------------|
| Adiponectin | Forward: GTCAGTGGATCTGACGACACCAA   |
|             | Reverse: ATGCCTGCCATCCAACCTG       |
| IL-6        | Forward: TCCAGTTGCCTTCTTGGGAC      |
|             | Reverse: GTGTAATTAAGCCTCCGACTTG    |
| Leptin      | Forward: GATGACACCAAAACCCTCATC     |
|             | Reverse: GCCACCACCTCTGTGGAGTAG     |
| TNF-α       | Forward: CAGGAGGGAGAACAGAAACTCCA   |
|             | Reverse: CCTGGTTGGCTGCTTGCTT       |
| Actin       | Forward: CATCCGTAAAGACCTCTATGCCAAC |
|             | Reverse: ATGGAGCCACCGATCCACA       |

**Figure S1.** The detailed procedures of random selection at delivery and weaning.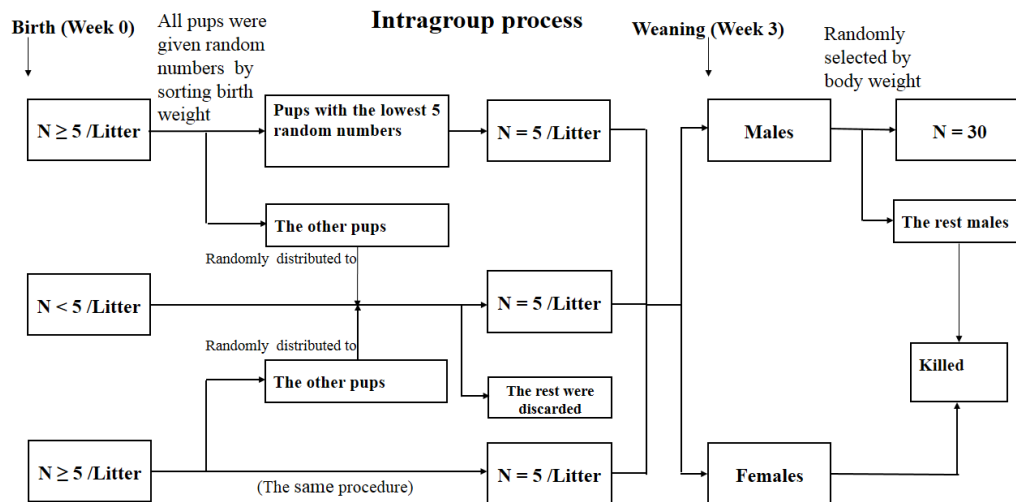

© 2014 by the authors; licensee MDPI, Basel, Switzerland. This article is an open access article distributed under the terms and conditions of the Creative Commons Attribution license (<http://creativecommons.org/licenses/by/3.0/>).
